# Supplementary material for: Sensitive colorimetric detection of CN− and AcO− anions in a semi-aqueous environment through a coumarin–naphthalene conjugate azo dye
Source: Royal Society of Chemistry journal article supplement (doi:10.1039/c9nj00004f), 2019-01-01
Supplement: c9nj00004f1.pdf [file c9nj00004f1.pdf]

**SUPPLEMENTARY INFORMATION**

**A sensitive colorimetric detection of  $\text{CN}^-$  and  $\text{AcO}^-$  anions in semi-aqueous environment**

**through a coumarin–naphthalene conjugate azo dye**

Sushil K. Dwivedi, Syed S. Razi and Arvind Misra\*

Department of Chemistry, Institute of Science

Banaras Hindu University, Varanasi – 221 005 UP INDIA

Corresponding Author E-mail: [amisra@bhu.ac.in](mailto:amisra@bhu.ac.in); [arvindmisra2003@yahoo.com](mailto:arvindmisra2003@yahoo.com).

*Phone: +91-542-6702503; Fax: +91-0542-2368127, 2368175*

## Contents

**Scheme S1:** (i) Ethylacetoacetate/piperidine/EtOH/ $\Delta$ , (ii) Br<sub>2</sub>/CHCl<sub>3</sub>/EtOH/r.t., (iii) thiourea/EtOH/r.t., (iv) a. H<sub>2</sub>SO<sub>4</sub>/AcOH, b. NaNO<sub>2</sub>/H<sub>2</sub>O/0°C, c. alk.  $\beta$ -naphthol.

**Figure S1:** <sup>1</sup>H NMR spectrum of **2** in CDCl<sub>3</sub>.

**Figure S2:** <sup>1</sup>H NMR spectrum of **3** in CDCl<sub>3</sub>.

**Figure S3:** <sup>1</sup>H NMR spectrum of **4** in CDCl<sub>3</sub>.

**Figure S4:** <sup>1</sup>H NMR spectrum of **5** in CDCl<sub>3</sub>.

**Figure S5:** <sup>1</sup>H-NMR spectrum of probe **5** in DMSO-*d*<sub>6</sub>.

**Figure S6:** <sup>13</sup>C NMR spectrum of **5** in CDCl<sub>3</sub>.

**Figure S7:** FT-IR spectrum of probe **5**.

**Figure S8:** ESI-MS spectrum of probe **5**.

**Figure S9:** Stacked <sup>1</sup>H NMR spectra of probe **5** (2.0 x 10<sup>-2</sup> M) upon addition of AcO<sup>-</sup> (0 - 2.0 equiv) in CDCl<sub>3</sub>.

**Figure S10:** <sup>1</sup>H NMR spectra of probe **5** upon addition 0.5 equiv. of CN<sup>-</sup> in CDCl<sub>3</sub>.

**Figure S11:** <sup>1</sup>H NMR spectra of probe **5** upon addition 1.0 equiv. of CN<sup>-</sup> in CDCl<sub>3</sub>.

**Figure S12:** <sup>1</sup>H NMR spectra of probe **5** upon addition 2.0 equiv. of CN<sup>-</sup> in CDCl<sub>3</sub>.

**Figure S13:** Stacked <sup>13</sup>C NMR spectra of probe **5** and **5**+CN<sup>-</sup> in CDCl<sub>3</sub>.

**Figure S14:** FT-IR spectrum of **5**+CN<sup>-</sup>.

**Figure S15:** ESI-MS spectrum of **5**+CN<sup>-</sup>.

**Figure S16:** ESI-MS spectrum of **5**+AcO<sup>-</sup>.

**Figure S17:** Absorption spectra of probe **5** in solvent of different polarity.

**Table-S1:** Photophysical property of probe **5** in solvent of different polarity.

**Figure S18:** Absorption spectra of probe **5** (10  $\mu$ M) after interaction with F<sup>-</sup>, CN<sup>-</sup>, AcO<sup>-</sup> in (a) acetonitrile, (b) acetonitrile:H<sub>2</sub>O (1:1, v/v), (c) DMSO and (d) DMSO:H<sub>2</sub>O (1:1, v/v).

**Figure S19:** Interaction of probe **5** with different metal ions in aqueous ethanol (1:1; v/v).

**Figure S20:** Interaction of probe **5** (10  $\mu$ M) with different anions in pure ethanol.

**Figure S21:** Bar Diagram of probe **5** (10  $\mu\text{M}$ ) after interaction with different anions.

**Figure S22:** Benesi-Hildebrand plot of probe **5** (10  $\mu\text{M}$ ) with (a)  $\text{CN}^-$  and (b)  $\text{AcO}^-$  ions.

**Figure S23:** Change in absorption spectra of probe **5** (10  $\mu\text{M}$ ) upon addition of different concentration of (a)  $\text{AcO}^-$  (b)  $\text{CN}^-$ .

**Figure S24:** Change in absorption spectra of probe **5** (10  $\mu\text{M}$ ) at different pH in HEPES buffer (DMSO:H<sub>2</sub>O; 9:1 v/v).

**Figure S25:** DFT method optimized minimum energy structure for azo and hydrazone form and HOMO-LUMO energy level for probe **5**.

**Materials and Chemicals:** All the reagent and solvents were purchased from Sigma-Aldrich Chemical Pvt. Ltd. Stored in a desiccator under vacuum containing self-indicating silica, and used without any further purification. Solvent were purified prior to use. UV-vis absorption spectra were recorded on a Perkin Elmer Lambda-35 UV-vis spectrophotometer using a quartz cuvette (path length = 1cm). Infrared (IR) spectra were recorded in potassium bromide (KBr) on Varian-3100 FT-IR spectrometer. <sup>1</sup>H NMR spectra were recorded (chemical shift in δ ppm) on a JEOL AL 300 and 500 FT-NMR (300 and 500MHz) spectrometer, using tetramethylsilane (TMS) as internal standard. All the spectroscopy experiments were carried out at room temperature. The stock solution of probe 5 (1 x 10<sup>-3</sup>) were prepared in EtOH and diluted to obtained 10 μM in mixture of EtOH and H<sub>2</sub>O (1:1, v/v) for absorption measurement. The stock solution of different anions (1 x 10<sup>-1</sup> M) was prepared by dissolving their inorganic salt in water. The anion interaction studies were performed by addition of 1 x 10<sup>-1</sup> M of different anions.

**Estimation of Binding Constant:** The absorption experimental data were utilized to calculate association constants by Benesi-Hildebrand method (B-H method) employing equations (1) for 1:1 stoichiometry.

$$1/(I - I_o) = 1/(I - I_f) + 1/K(I - I_f)[M] \quad (1)$$

Where K is the association constant, *I* is the absorbance of the free probe **5**, *I*<sub>o</sub> is the observed absorbance of the **5**+CN<sup>-</sup> and **5**+AcO<sup>-</sup> in equation (1) complex, and *I*<sub>f</sub> is the absorbance at saturation level.

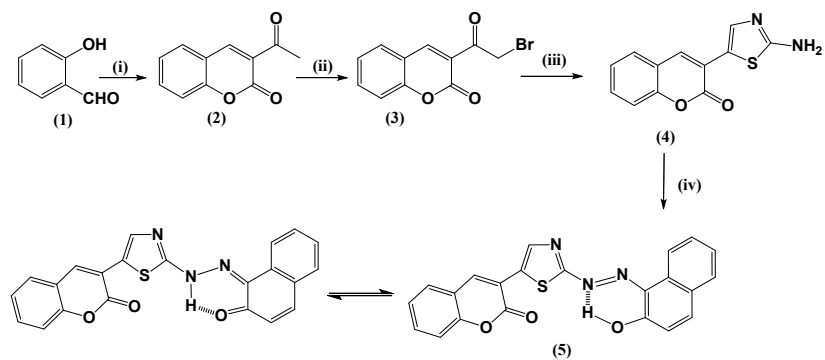

**Scheme S1:** (i) Ethylacetoacetate/piperidine/EtOH/ $\Delta$ , (ii)  $\text{Br}_2/\text{CHCl}_3/\text{EtOH}/\text{r.t.}$ , (iii) thiourea/EtOH/r.t., (iv) a.  $\text{H}_2\text{SO}_4/\text{AcOH}$ , b.  $\text{NaNO}_2/\text{H}_2\text{O}/0^\circ\text{C}$ , c. alk.  $\beta$ -naphthol.

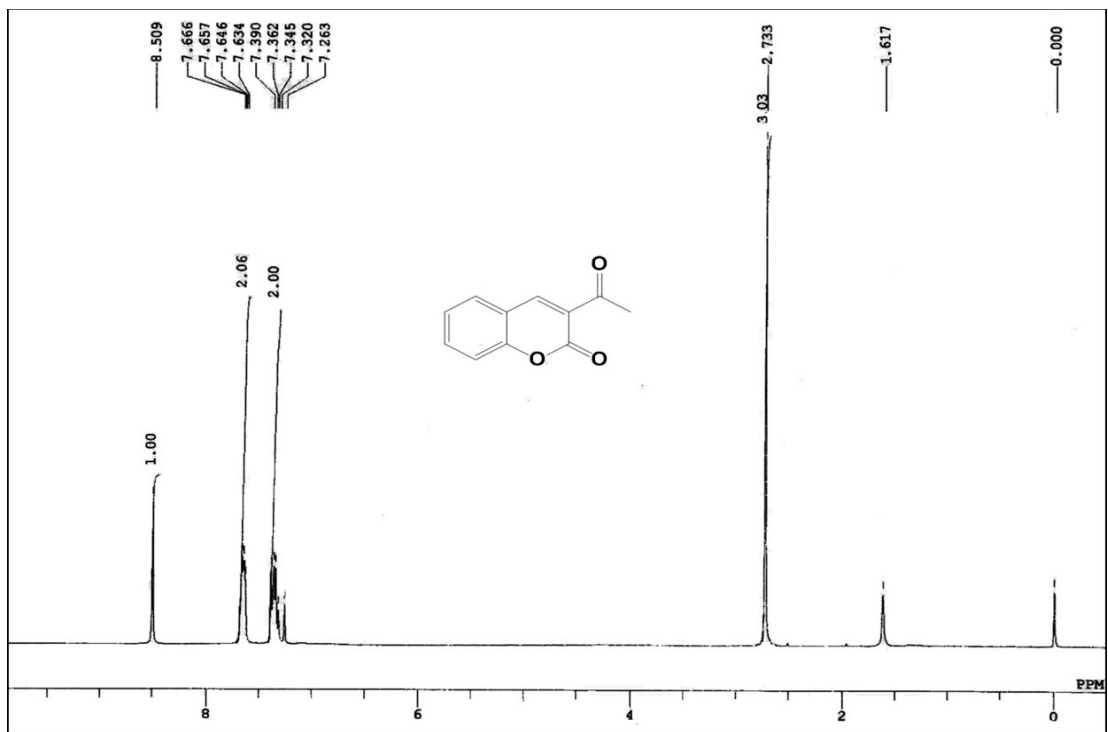

**Figure S1:**  $^1\text{H}$  NMR spectrum of **2** in  $\text{CDCl}_3$ .

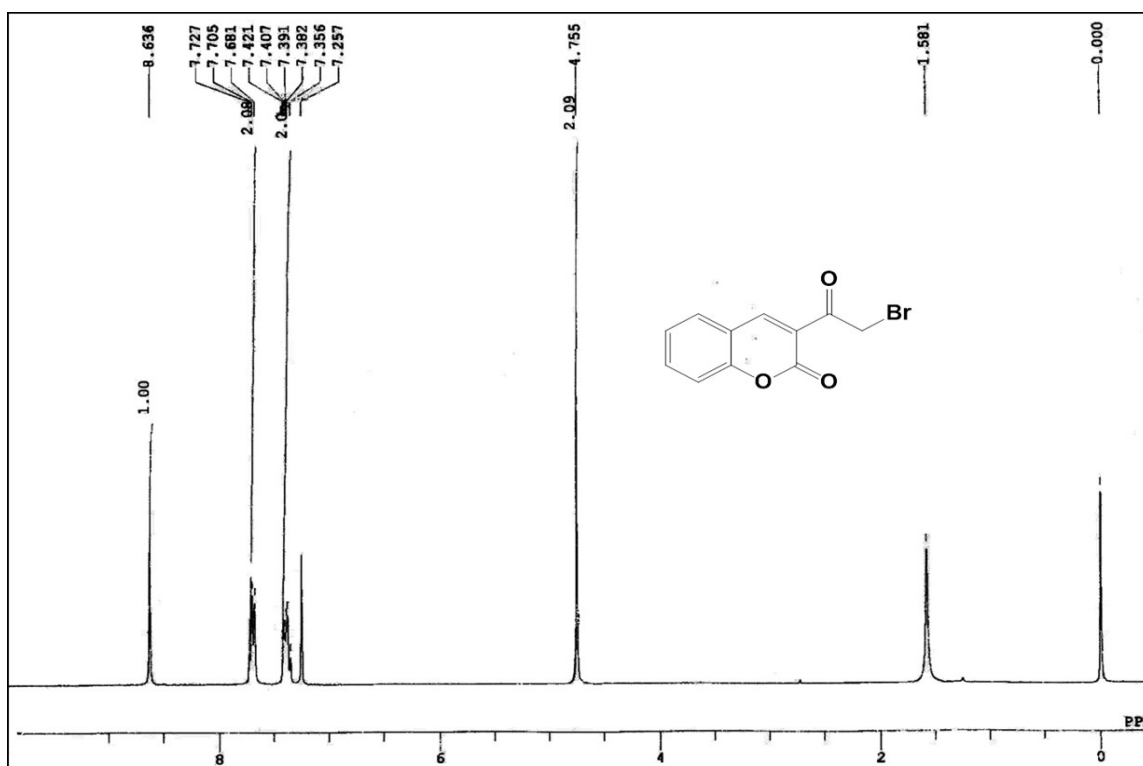

**Figure S2:**  $^1\text{H}$  NMR spectrum of **3** in  $\text{CDCl}_3$ .

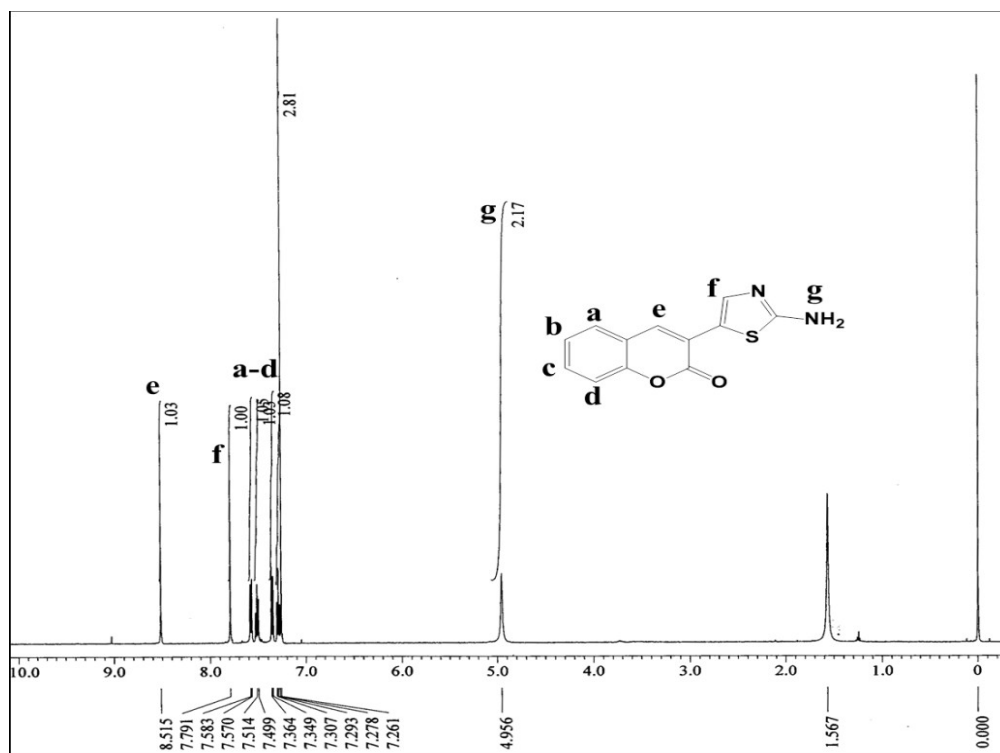

Figure S3:  $^1\text{H}$  NMR spectrum of **4** in  $\text{CDCl}_3$ .



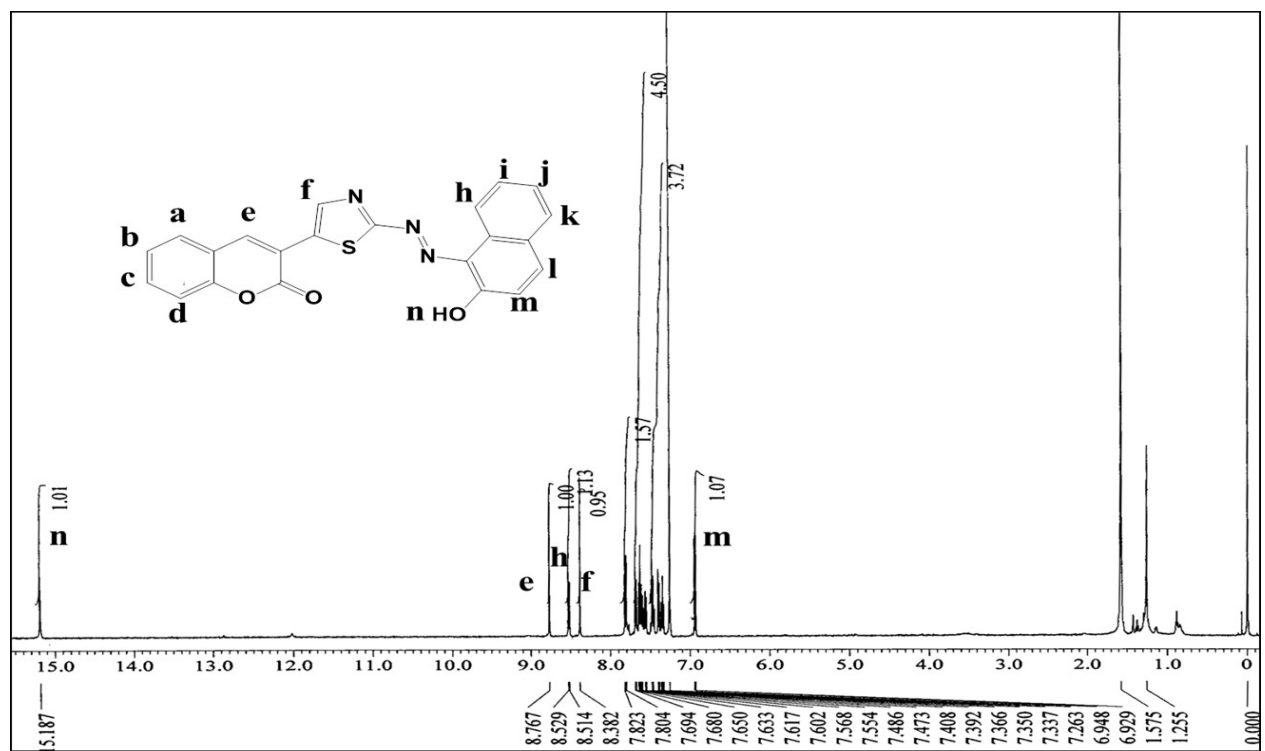

**Figure S4:** <sup>1</sup>H NMR spectrum of **5** in CDCl<sub>3</sub>.

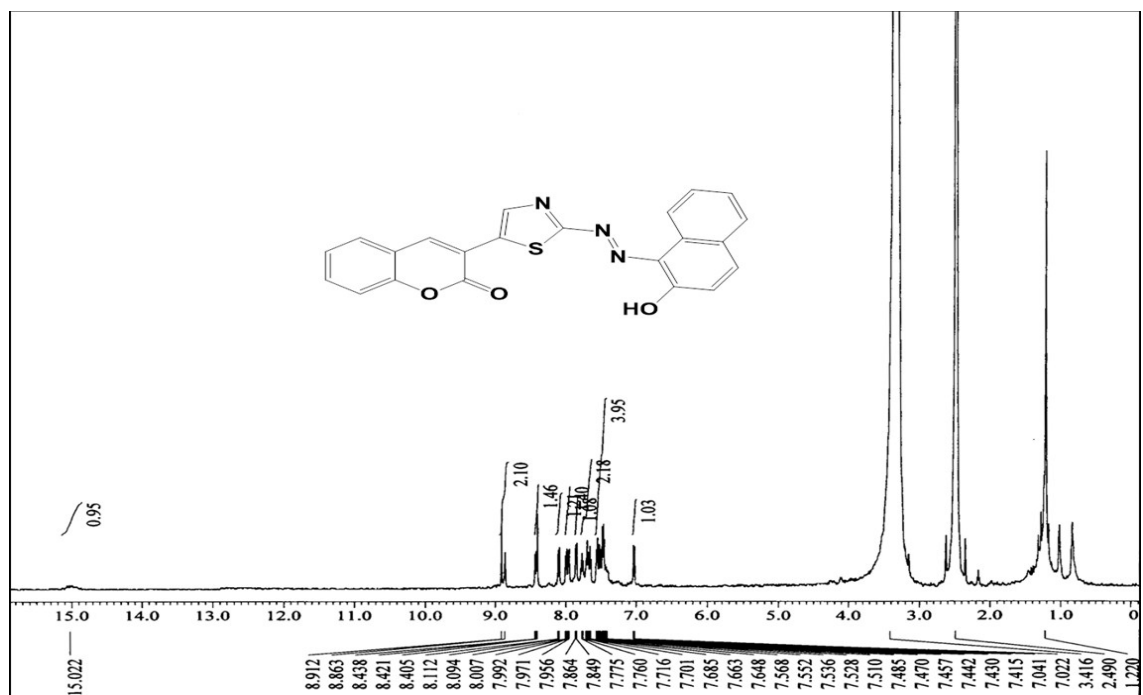

**Figure S5:** <sup>1</sup>H-NMR spectrum of probe 5 in DMSO-d<sub>6</sub>.

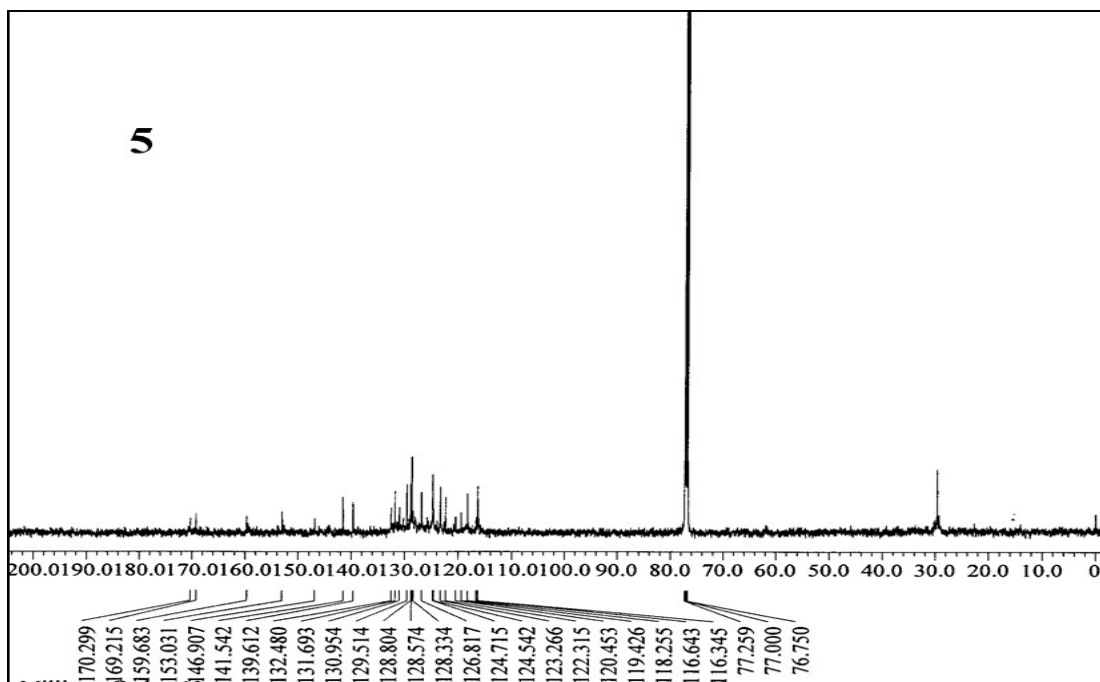

**Figure S6:**  $^{13}\text{C}$  NMR spectrum of **5** in  $\text{CDCl}_3$ .

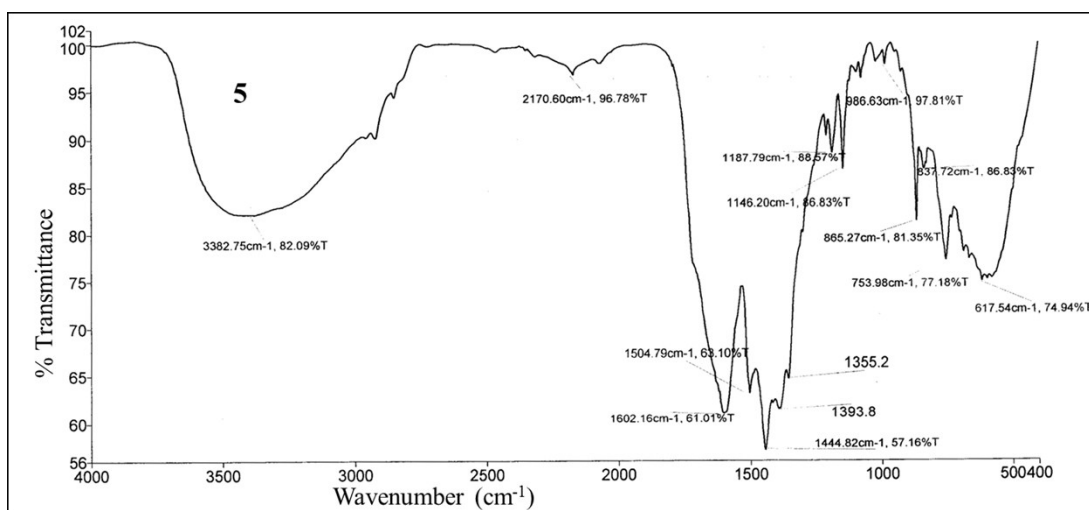

**Figure S7:** FT-IR spectrum of probe 5.

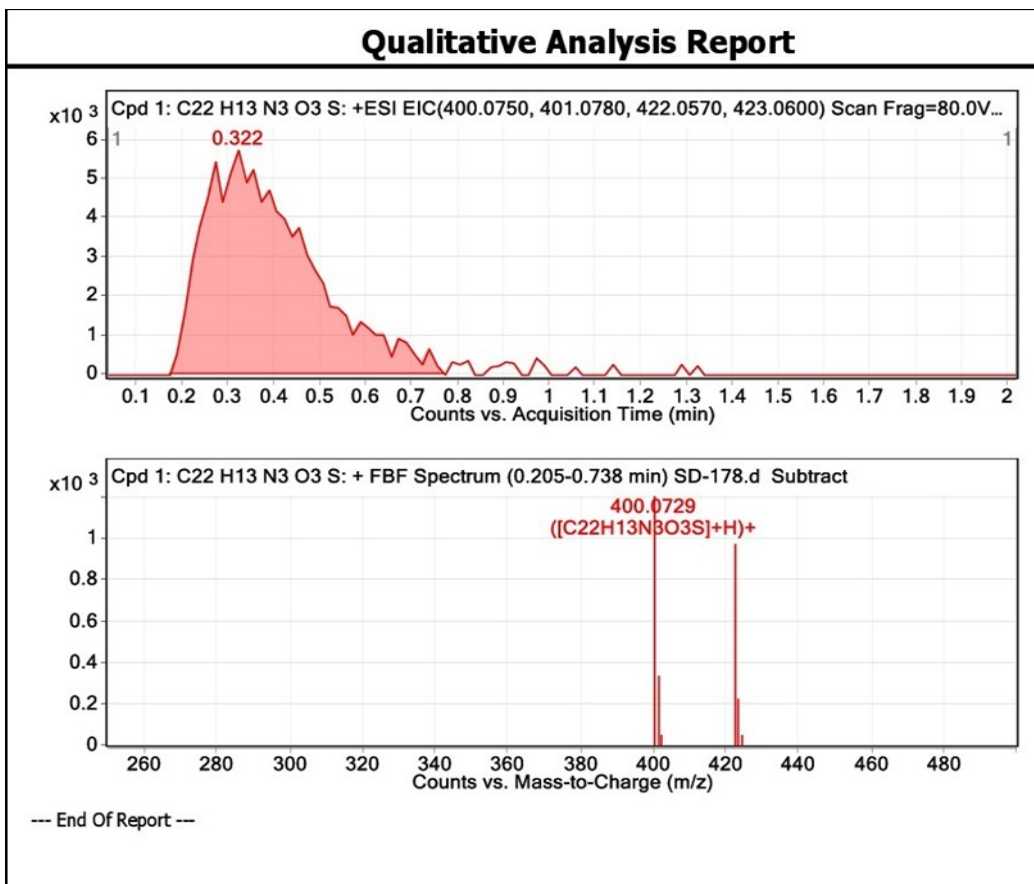

**Figure S8:** ESI-MS spectrum of probe 5.

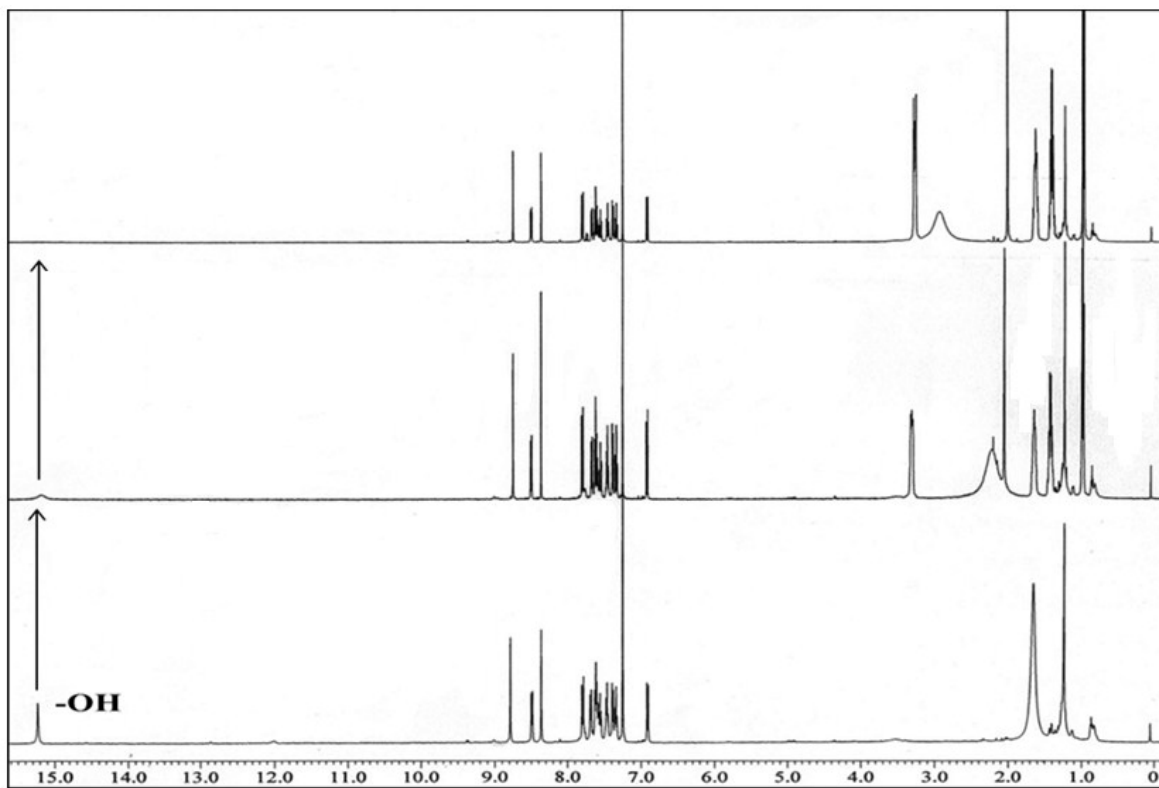

**Figure S9:** Stacked  $^1\text{H}$  NMR spectra of probe **5** ( $2.0 \times 10^{-2}$  M) upon addition of  $\text{AcO}^-$  (0 - 2.0 equiv) in  $\text{CDCl}_3$ .

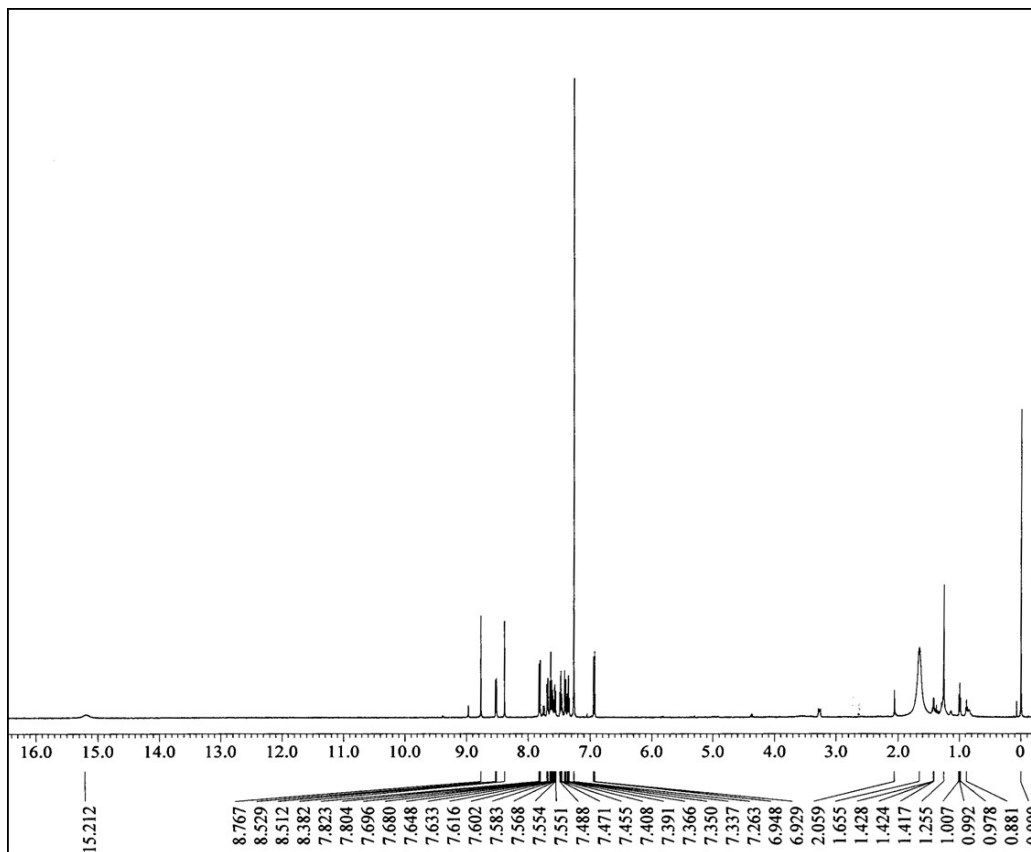

**Figure S10:** <sup>1</sup>H NMR spectra of probe **5** upon addition 0.5 equiv. of CN<sup>-</sup> in CDCl<sub>3</sub>.

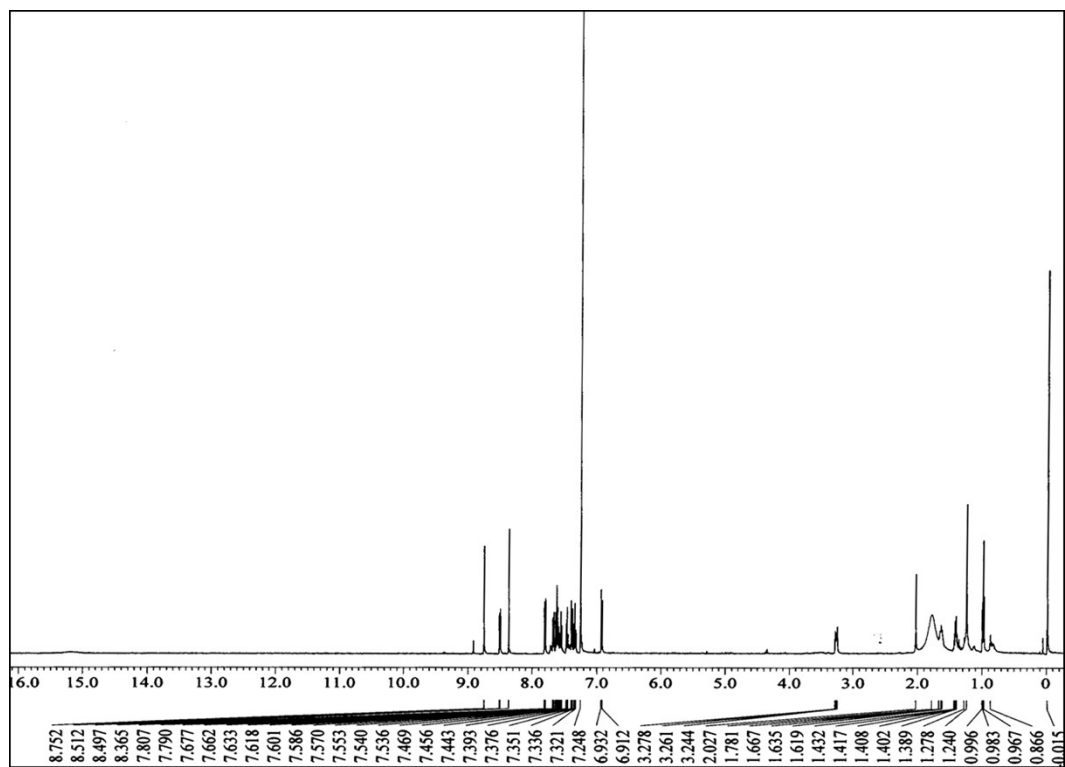

**Figure S11:**  $^1\text{H}$  NMR spectra of probe **5** upon addition 1.0 equiv. of  $\text{CN}^-$  in  $\text{CDCl}_3$ .



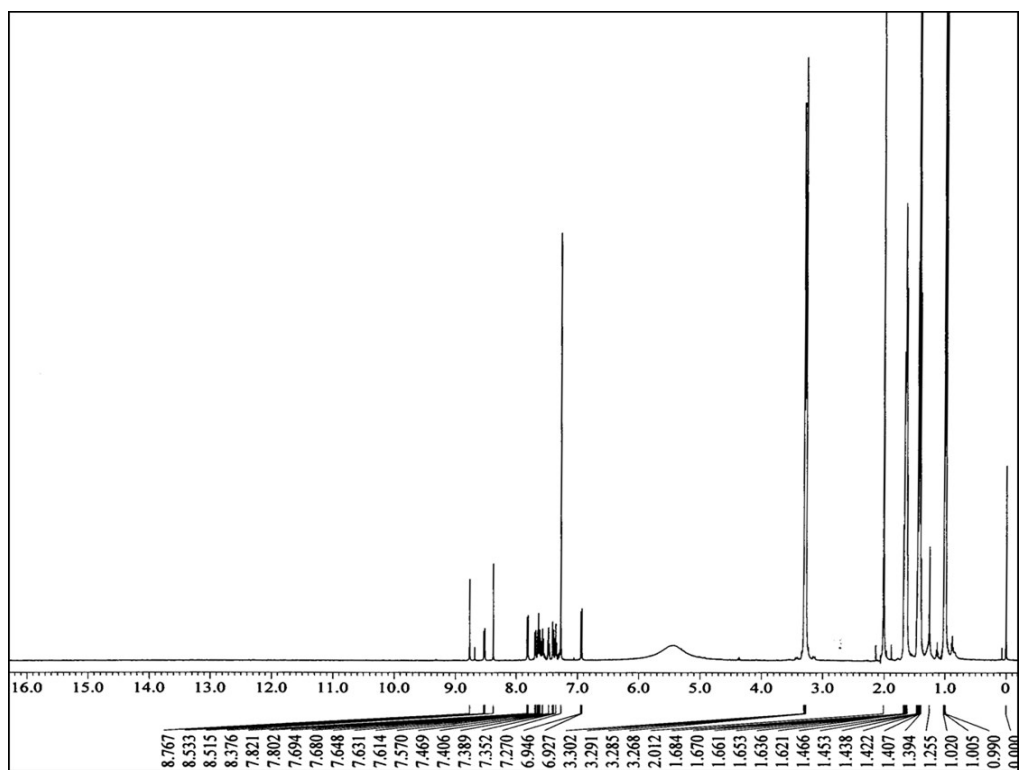

**Figure S12:** <sup>1</sup>H NMR spectra of probe **5** upon addition 2.0 equiv. of CN<sup>-</sup> in CDCl<sub>3</sub>.

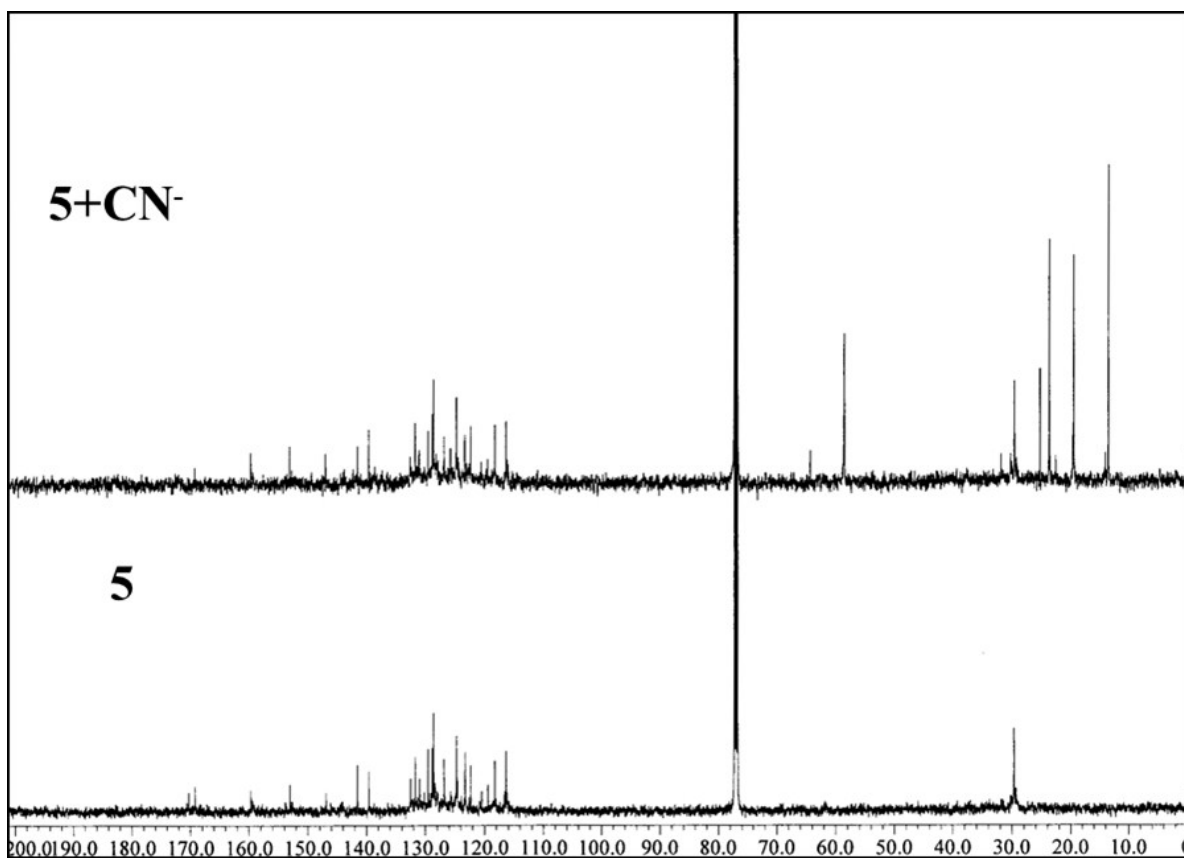

**Figure S13:** Stacked <sup>13</sup>C NMR spectra of probe **5** and **5+CN<sup>-</sup>** in CDCl<sub>3</sub>.

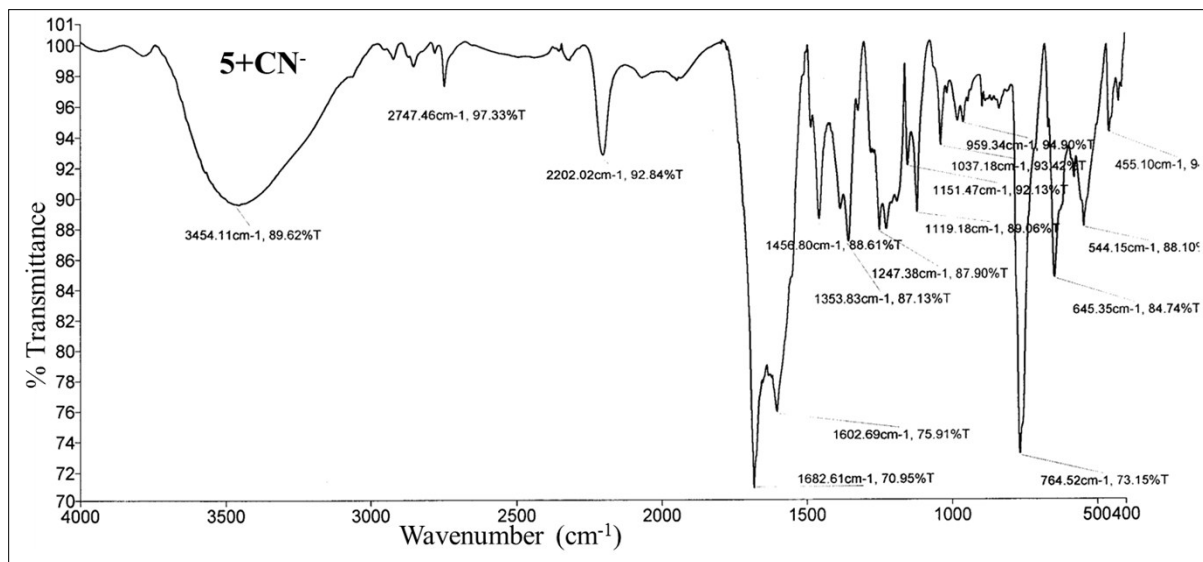

**Figure S14:** FT-IR spectrum of 5+CN<sup>-</sup>.

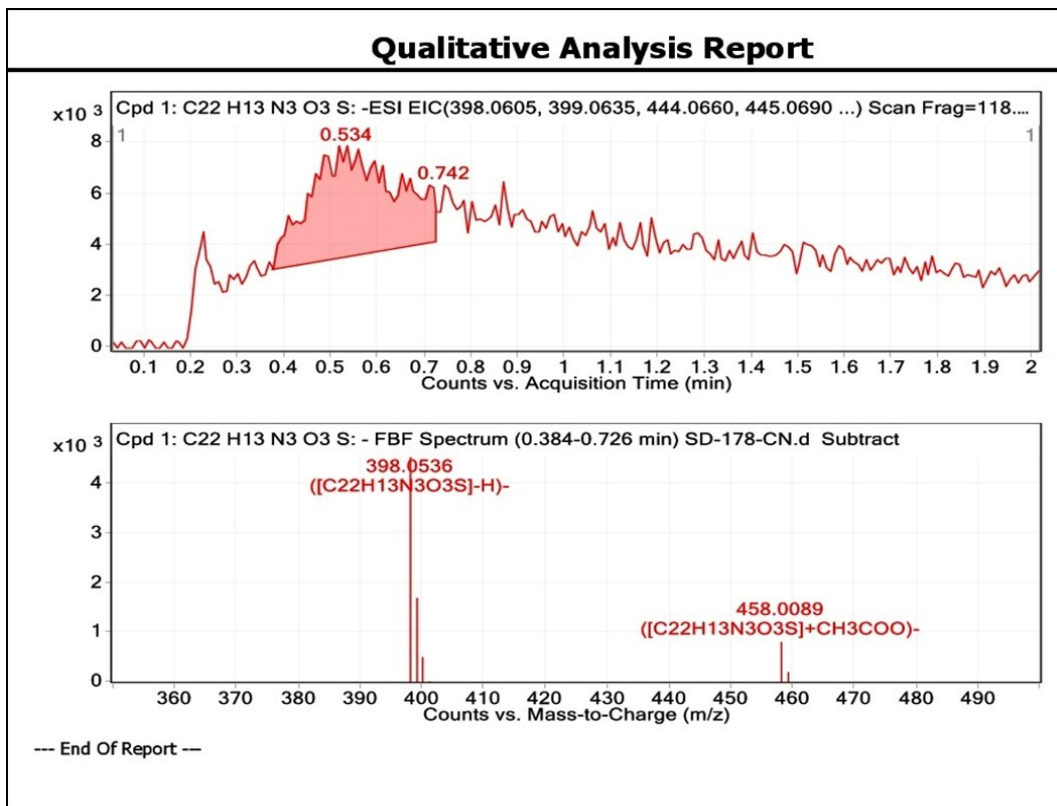

**Figure S15:** ESI-MS spectrum of  $5+\text{CN}^-$ .

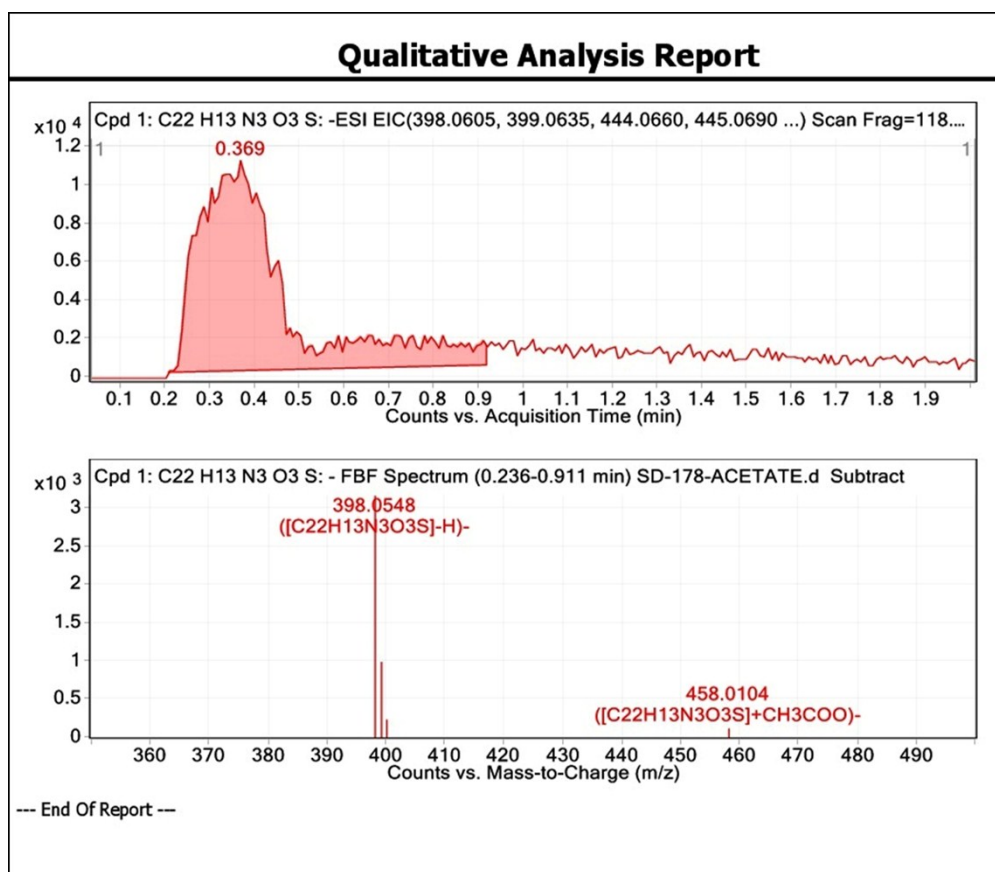

**Figure S16:** ESI-MS spectrum of 5+AcO-.

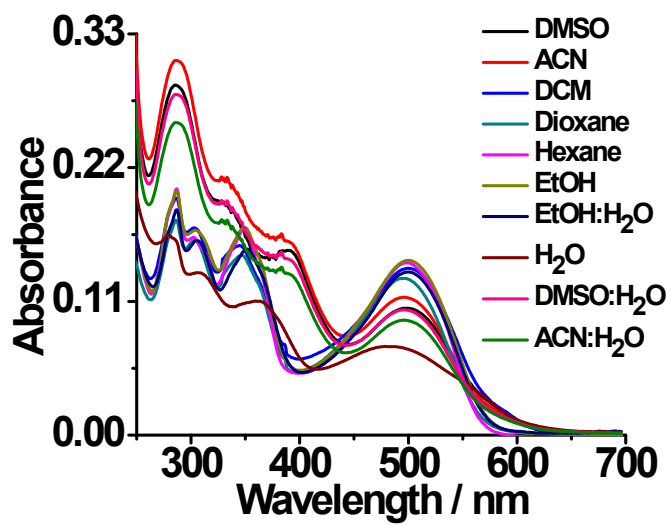

**Figure S17:** Absorption spectra of probe 5 in solvent of different polarity.

**Table-S1:** Photophysical property of probe **5** in solvent of different polarity.

| Properties            | $\lambda_{\max}$   | $\epsilon$ ( $\text{cm}^{-1}\text{M}^{-1}$ )                                                  |
|-----------------------|--------------------|-----------------------------------------------------------------------------------------------|
| Hexane                | 283, 299, 346, 496 | $2.0148 \times 10^4$ , $1.6219 \times 10^4$ , $1.6983 \times 10^4$ ,<br>$1.4167 \times 10^4$  |
| DMSO                  | 284, 329, 390, 502 | $2.8858 \times 10^4$ , $1.9112 \times 10^4$ , $1.5106 \times 10^4$ ,<br>$1.0403 \times 10^4$  |
| DCM                   | 286, 302, 344, 498 | $1.9461 \times 10^4$ , $1.7070 \times 10^4$ , $1.5609 \times 10^4$ ,<br>$1.3732 \times 10^4$  |
| H <sub>2</sub> O      | 280, 309, 365, 481 | $1.6209 \times 10^4$ , $1.3306 \times 10^4$ , $1.1003 \times 10^4$ ,<br>$0.7277 \times 10^4$  |
| Dioxane               | 286, 303, 348, 499 | $1.9479 \times 10^4$ , $1.6896 \times 10^4$ , $1.6722 \times 10^4$ ,<br>$1.4419 \times 10^4$  |
| MeCN                  | 287, 333, 389, 499 | $3.0822 \times 10^4$ , $2.1164 \times 10^4$ , $1.5870 \times 10^4$ ,<br>$1.1193 \times 10^4$  |
| EtOH                  | 284, 303, 348, 499 | $1.8554 \times 10^4$ , $1.5935 \times 10^4$ , $1.6983 \times 10^4$ ,<br>$1.4322 \times 10^4$  |
| EtOH-H <sub>2</sub> O | 285, 304, 350, 498 | $1.5435 \times 10^4$ , $1.5870 \times 10^4$ , $1.5183 \times 10^4$ ,<br>$1.3393 \times 10^4$  |
| DMSO-H <sub>2</sub> O | 287, 331, 386, 498 | $2.8006 \times 10^4$ , $1.9287 \times 10^4$ , $1.44193 \times 10^4$ ,<br>$1.0229 \times 10^4$ |
| ACN-H <sub>2</sub> O  | 287, 321, 387, 499 | $2.5693 \times 10^4$ , $1.7661 \times 10^4$ , $1.3393 \times 10^4$ ,<br>$0.9464 \times 10^4$  |

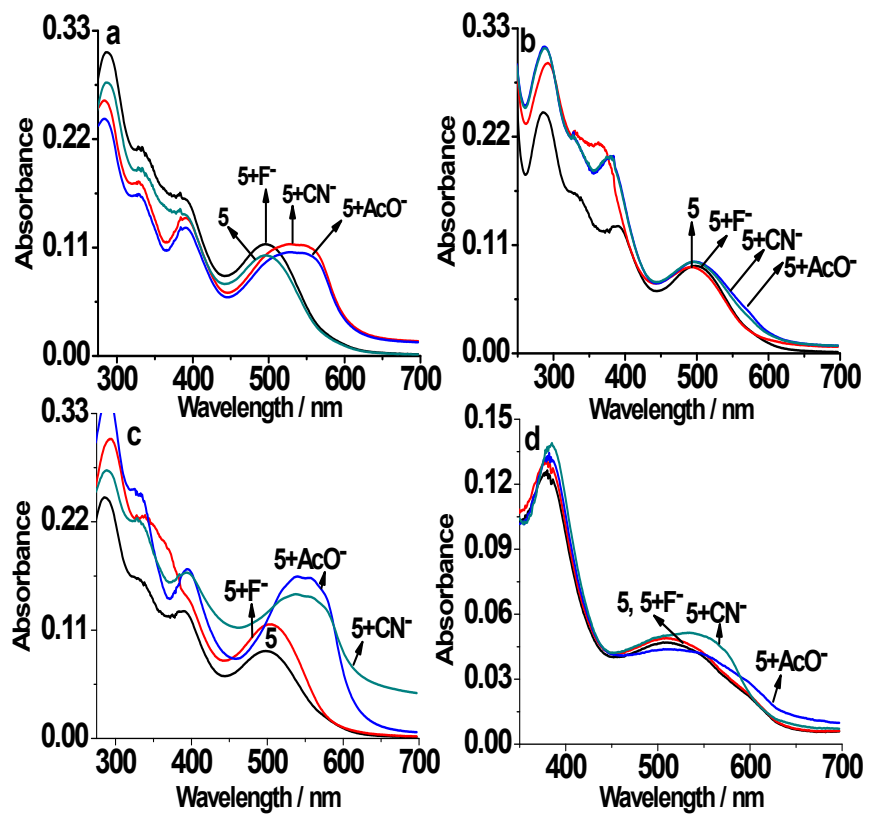

**Figure S18:** Absorption spectra of probe 5 (10  $\mu\text{M}$ ) after interaction with  $\text{F}^-$ ,  $\text{CN}^-$ ,  $\text{AcO}^-$  in (a) acetonitrile, (b) acetonitrile:H<sub>2</sub>O (1:1, v/v), (c) DMSO and (d) DMSO:H<sub>2</sub>O (1:1, v/v).



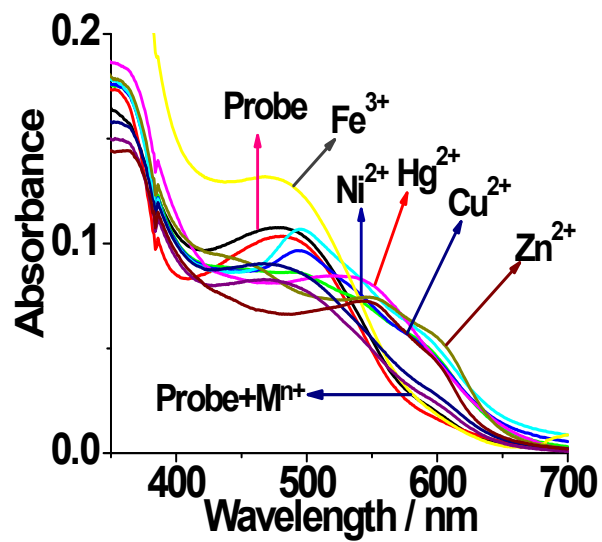

**Figure S19:** Interaction of probe 5 with different metal ions in aqueous ethanol (1:1; v/v).

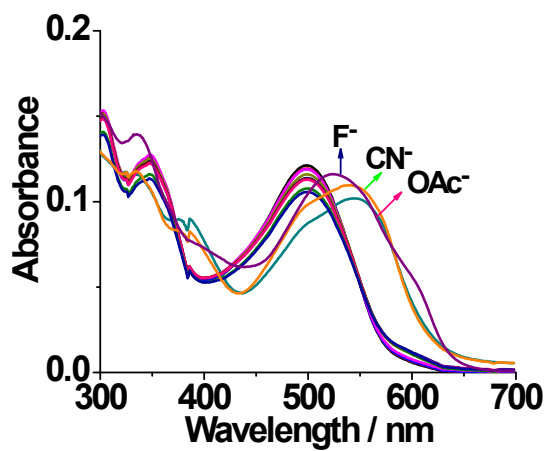

**Figure S20:** Interaction of probe 5 (10  $\mu$ M) with different anions in pure ethanol.

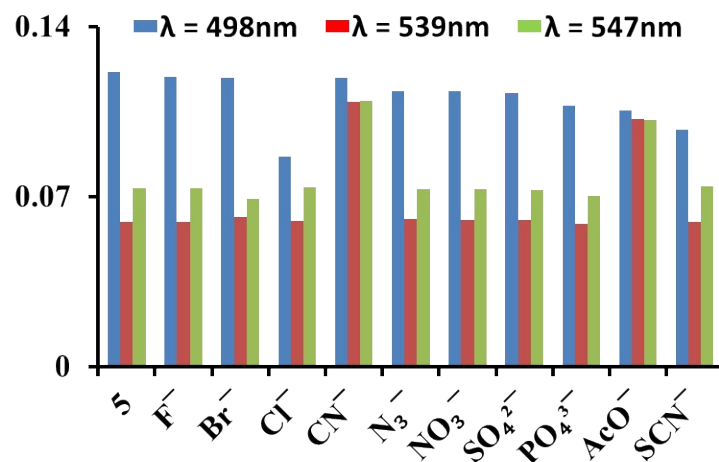

**Figure S21:** Bar Diagram of probe **5** (10  $\mu\text{M}$ ) after interaction with different anions.

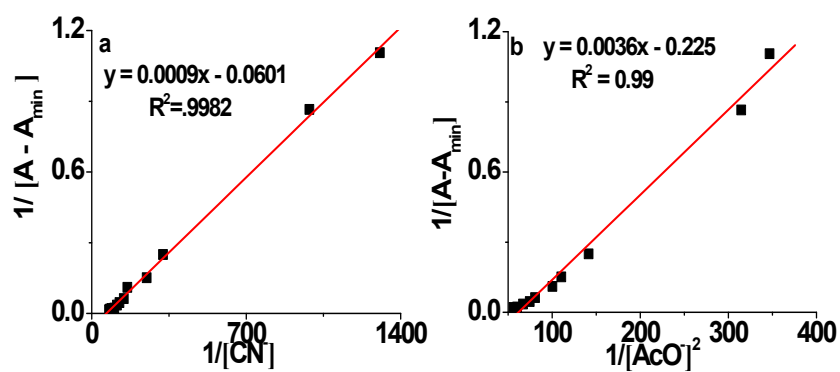

**Figure S22:** Benesi-Hildebrand plot of probe **5** (10  $\mu\text{M}$ ) with (a) CN<sup>-</sup> and (b) AcO<sup>-</sup> ions.

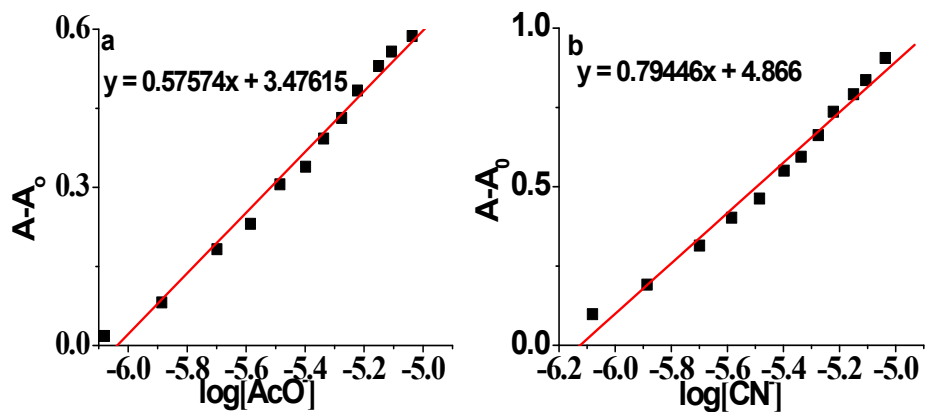

**Figure S23:** Change in absorption spectra of probe 5 (10 μM) upon addition of different concentration of (a) AcO<sup>-</sup> (b) CN<sup>-</sup>.

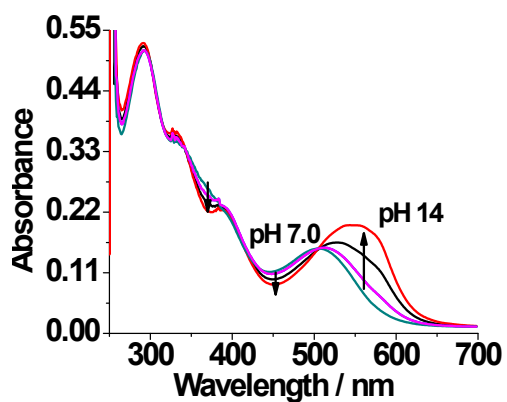

**Figure S24:** Change in absorption spectra of probe 5 (10 μM) at different pH in HEPES buffer (DMSO:H<sub>2</sub>O; 9:1 v/v).

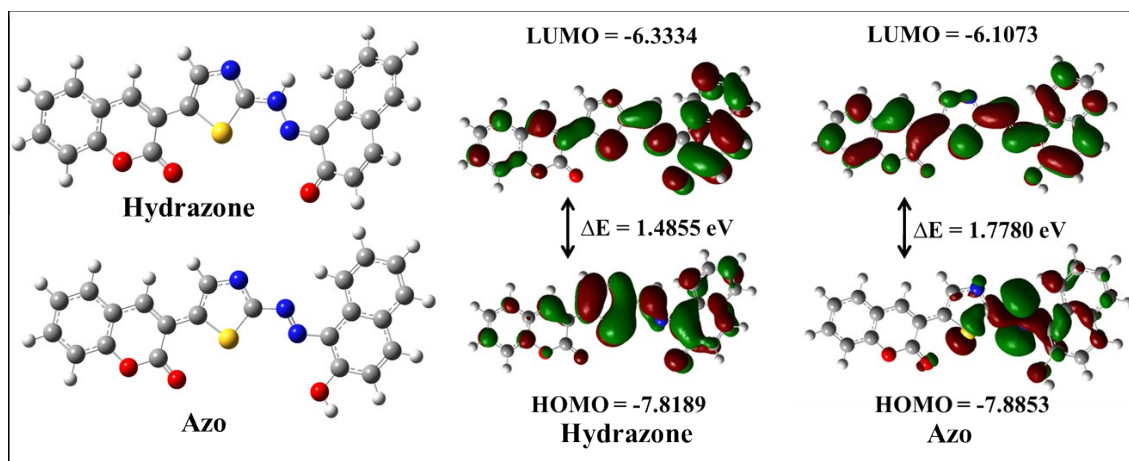

**Figure S25:** DFT method optimized minimum energy structure for azo and hydrazone form and HOMO-LUMO energy level for probe 5.
